# Supplementary material
Source: PubMed Central journal article supplement (PMC3831495)
Supplement: 1314177110_pnas.201314177SI.pdf [file 1314177110_pnas.201314177SI.pdf]

# Supporting Information

Blouin et al. 10.1073/pnas.1314177110

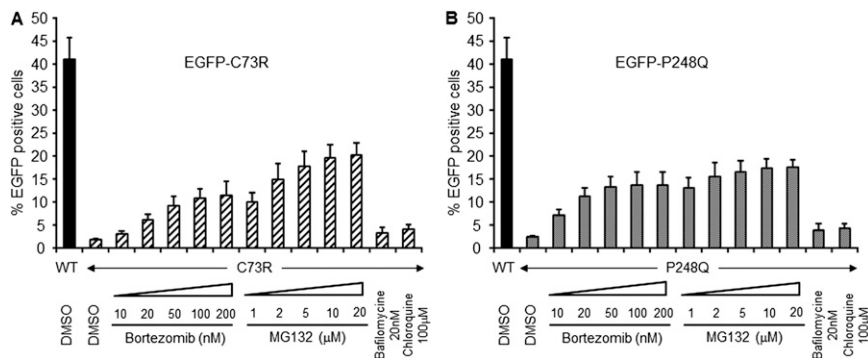

**Fig. S1.** UROS<sup>P248Q</sup> and UROS<sup>C73R</sup> mutants trigger premature degradation by the proteasome pathway in human erythroid K562 cells. (A and B) Human erythroleukemic K562 cells were stably transfected with plasmids expressing EGFP fused to the C terminus of WT, C73R, or P248Q UROS cDNA. Stably transfected cells were treated with DMSO or the indicated concentration of lysosome inhibitor (bafilomycin or chloroquine) or proteasome inhibitor (MG132 or bortezomib) for 16 h. EGFP expression was monitored by flow cytometry analysis. Results are expressed as the mean of three independent experiments; error bars represent SD. \*Significant difference ( $P < 0.001$ ) vs. mutant UROS-EGFP treated with DMSO.

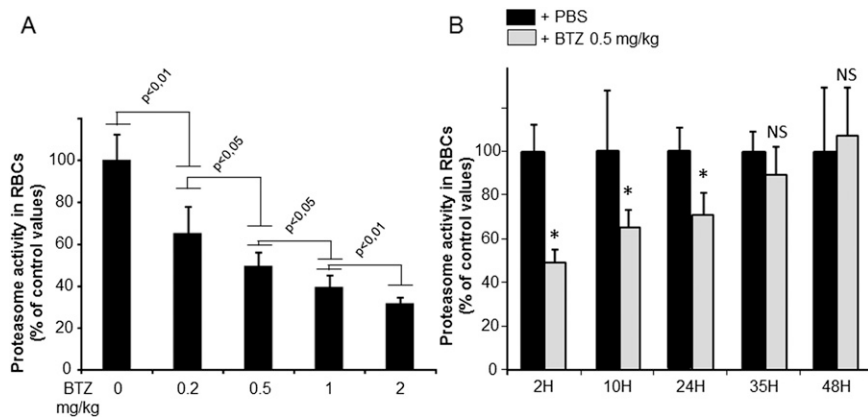

**Fig. S2.** Dose-dependent inhibition of proteasome activity was evaluated in normal mice after a single bortezomib injection. (A) Proteasome activity was quantified in blood lysates from mice ( $n = 6$  per group) at 2 h after a single dose of bortezomib (0.2–2 mg/kg). A dose-dependent inhibition of proteasome activity was observed in vivo. (B) Proteasome activity was quantified over time (from 2 h to 48 h) in peripheral RBCs from mice injected with a single dose of bortezomib (0.5 mg/kg). Proteasome activity recovered completely within 2 d after bortezomib injection. \*Significant difference ( $P < 0.01$ ) vs. PBS-injected mice.
